# Supplementary material for: Application of Engineering Efferocytosis-Mimicking Nanovesicles in Atherosclerosis Treatment via M1 Macrophages and celluar lipid metabolic reprogramming
Source: Research Square preprint supplement (doi:10.21203/rs.3.rs-8705147/v1), 2026-02-09

# Figure 5B

Full unedited gel for Figure 1  
Catalogue numbers of the ladders:  
(Thermo Scientific) PageRuler  
Prestained protein ladder 26617  
<https://www.thermofisher.cn/order/catalog/product/cn/zh/26617>

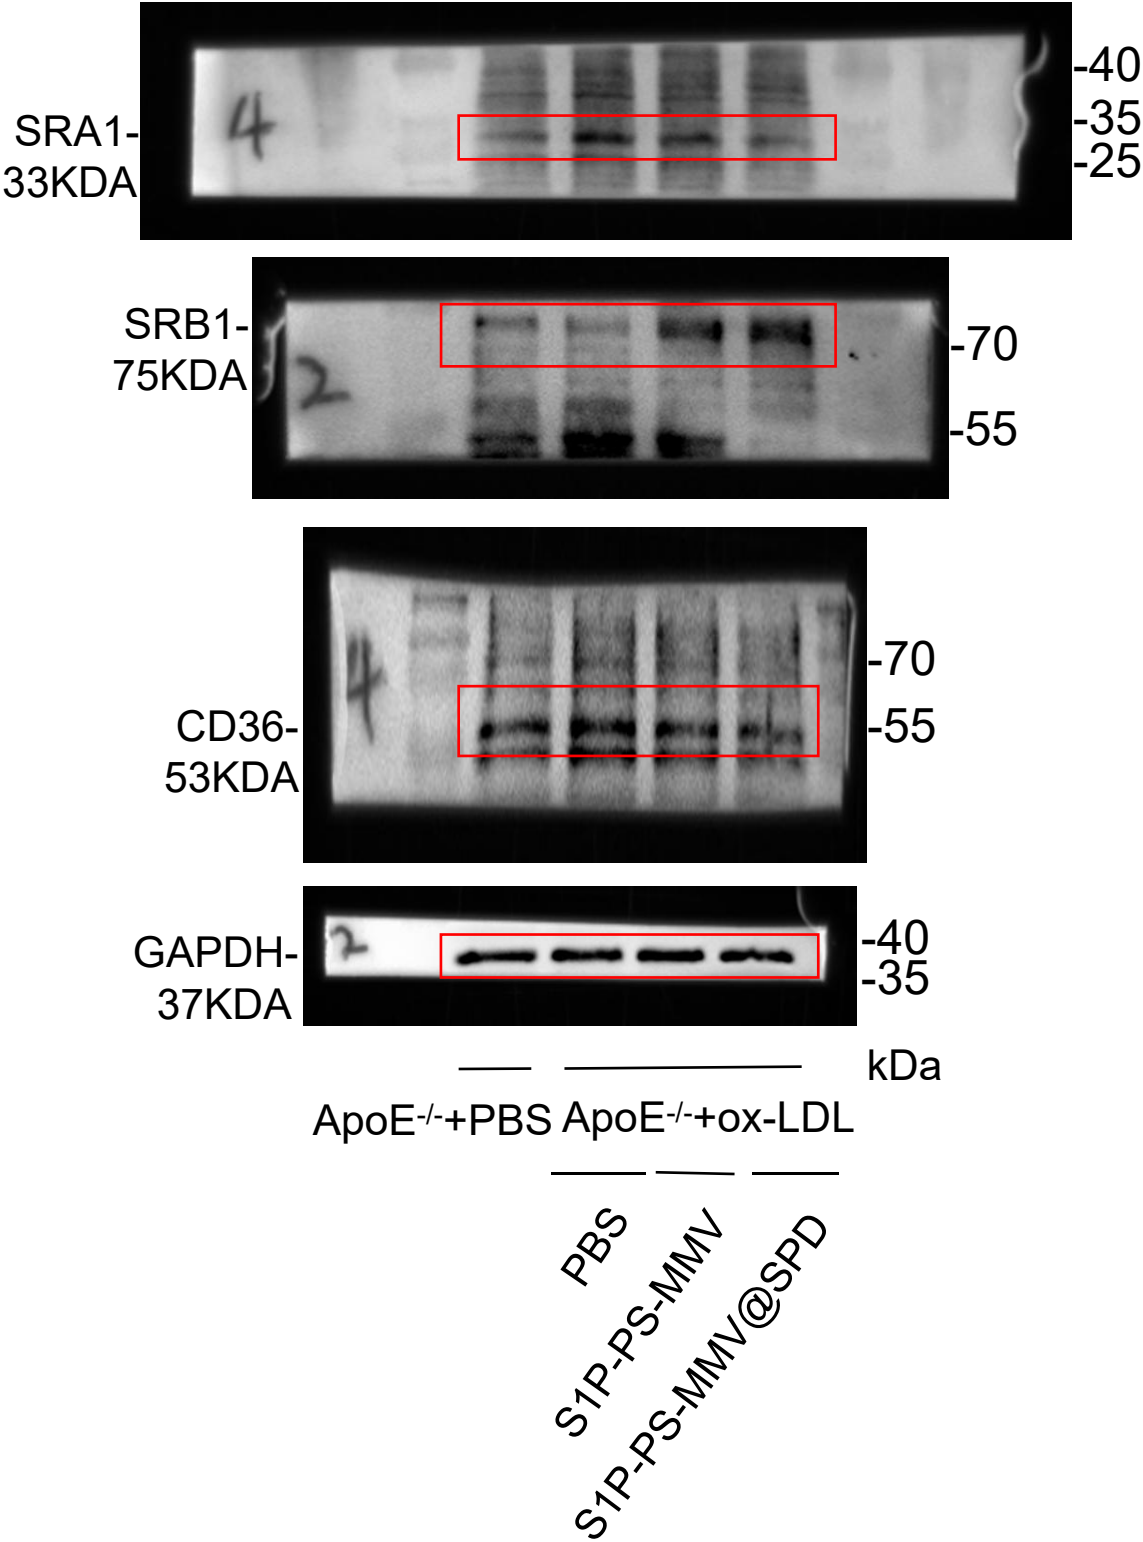

Supplement: Supplementary file 1 [file 1704a1057d260c4f0dbfcf18.pdf]
